# Supplementary material for: A chromosome-level genome of the helmet catfish (Cranoglanis bouderius)
Source: Front Genet. 2022 Aug 10;13:962406. doi: 10.3389/fgene.2022.962406 (PMC9400026; doi:10.3389/fgene.2022.962406)
Supplement: Supplementary file 2 [file DataSheet2.xlsx]

## Sheet: Table S1
Supplementary Table S1. Details for sequencing data.
Library	Library Strategy	Application	Sample	Clean reads	Clean base (Gb)
PromethION of Cranoglanis bouderius:Blood	WGS	Genome assemble	Blood	8268999	92.5
PacBio SequelⅡof Cranoglanis bouderius:Blood	WGS	Genome assemble and Polishing	Blood	856411	13.62
NGS of Cranoglanis bouderius:Kidney	Hi-C	Genome assemble	Kidney	922373702	138.25
NGS of Cranoglanis bouderius:Blood	WGS	Survey and polishing	Blood	264255586	36.82
RNA-Seq (PromethION) of Cranoglanis bouderius:Pooled	RNA-Seq	Annotation	Pooled	12075762	19.79
RNA-Seq of Cranoglanis bouderius:Adipose fin	RNA-Seq	Annotation	Adipose fin	47257618	7.08
RNA-Seq of Cranoglanis bouderius:Brain	RNA-Seq	Annotation	Brain	47188144	7.07
RNA-Seq of Cranoglanis bouderius:Fin	RNA-Seq	Annotation	Fin	47298444	7.09
RNA-Seq of Cranoglanis bouderius:Gill	RNA-Seq	Annotation	Gill	46905528	7.03
RNA-Seq of Cranoglanis bouderius:Gonad	RNA-Seq	Annotation	Gonad	47660616	7.14
RNA-Seq of Cranoglanis bouderius:Head kidney	RNA-Seq	Annotation	Head kidney	46944688	7.03
RNA-Seq of Cranoglanis bouderius:Heart	RNA-Seq	Annotation	Heart	45483786	6.81
RNA-Seq of Cranoglanis bouderius:Kidney	RNA-Seq	Annotation	Kidney	47352476	7.09
RNA-Seq of Cranoglanis bouderius:Liver	RNA-Seq	Annotation	Liver	46616510	6.99
RNA-Seq of Cranoglanis bouderius:Muscle	RNA-Seq	Annotation	Muscle	46718312	7
RNA-Seq of Cranoglanis bouderius:Spleen	RNA-Seq	Annotation	Spleen	47015168	7.04

## Sheet: Table S2
Supplementary Table S2. Genome size estimation based on 17-mer statistics.
Sample	K-mer	K-mer num	K-mer Depth	Genome size (bp)	Heterozygous ratio (%)
C. bouderius	17	31657679731	34	931108227	0.005

## Sheet: Table S3
Supplementary Table S3. The statistics of Cranoglanis bouderius genome based on long reads.
Stat type	Polish Genome
	Contig Length (bp)	Contig Number
N50	20010353	19
N60	18094650	24
N70	17043930	29
N80	15263904	34
N90	4782803	43
Longest	35885533	1
Shortest	25068	231
Total	881329051	231

## Sheet: Table S4
Supplementary Table S4. Summary of the RNA-Seq reads mapping rate to genome assembly.
Sample	Adipose fin	Brain	Fin	Gill	Gonad	Head kidney	Heart	Kidney	Liver	Muscle	Spleen
Mapping Rate (%)	93.86	92.23	93.98	92.02	93.56	92.78	93.01	93.07	93.84	93.56	92.92

## Sheet: Table S5
Supplementary Table S5. Assessment of Cranoglanis bouderius genome completeness by BUSCO.
Type	Number	Percent (%)
Complete BUSCO (C)	3484	95.71
Complete and single-copy BUSCO (S)	3436	94.4
Complete and duplicated BUSCO (D)	48	1.32
Fragmented BUSCO (F)	18	0.49
Missing BUSCO (M)	138	3.79
Total BUSCO groups searched	3640	100

## Sheet: Table S6
Supplementary Table S6. The statistics of pseudochromosome assemblies using Hi-C data.
Chr	Size(bp)	Contig No
LG01	39432781	4
LG02	36488402	4
LG03	35936539	6
LG04	34281393	40
LG05	33816461	2
LG06	29504014	7
LG07	28723409	1
LG08	28550005	66
LG09	25784907	4
LG10	25390485	3
LG11	24835164	8
LG12	23853024	2
LG13	23527669	4
LG14	23240826	3
LG15	23006433	1
LG16	22156885	2
LG17	21971103	1
LG18	21513971	5
LG19	21239818	3
LG20	21163991	4
LG21	21067999	1
LG22	20934911	2
LG23	20274229	6
LG24	20247322	2
LG25	20186592	1
LG26	20010353	1
LG27	19882720	6
LG28	19784554	2
LG29	18375433	3
LG30	18268761	2
LG31	17924308	2
LG32	17906122	4
LG33	17402417	1
LG34	17260344	5
LG35	16727391	3
LG36	16341331	1
LG37	15893654	1
LG38	13724233	1
Total	876629954	214

## Sheet: Table S7
Supplementary Table S7. The statistics of repeated sequences in Cranoglanis bouderius genome.
Class	Order	Super family	Number	Length(bp)	% of sequence
Class I Tes			856021	129351842	14.68
	LTR		450610	64231093	7.29
		Unknown	252631	34461558	3.91
		ERV1	52669	7862898	0.89
		Gypsy	78684	14855905	1.69
		ERVK	26250	913149	0.1
		DIRS	12179	3429205	0.39
		Other	28197	2708378	0.31
	LINE		292227	55729953	6.32
		L1	15952	2123154	0.24
		Unknown	104502	17841745	2.02
		L2	73224	12193680	1.38
		RTE-BovB	12438	8208532	0.93
		L1-Tx1	15330	5320261	0.6
		RTE-X	8257	947235	0.11
		Penelope	18589	2029854	0.23
		Rex-Babar	20705	4584946	0.52
		Other	23230	2480546	0.28
	SINE		113184	9390796	1.07
		Unknown	44792	3885396	0.44
		5S-Deu-L2	3505	936516	0.11
		tRNA-V-CR1	16356	1756491	0.2
		Other	48531	2812393	0.32
Class II Tes			1736217	257307066	29.19
	DNA		1598759	212039614	24.06
		Unknown	453764	49513254	5.62
		TcMar-Tc1	327711	95952687	10.89
		Merlin	15511	909637	0.1
		hAT-Tip100	28205	1751316	0.2
		PIF-Harbinger	39649	3233462	0.37
		CMC-EnSpm	132728	8270408	0.94
		Ginger	32422	2005244	0.23
		hAT-Charlie	39805	3507591	0.4
		hAT-Ac	87675	7352090	0.83
		Kolobok-T2	26014	2029670	0.23
		IS3EU	15742	2741402	0.31
		hAT-Blackjack	12748	949232	0.11
		Crypton-V	21543	1058424	0.12
		Zisupton	39438	2764796	0.31
		hAT	25380	2752830	0.31
		MULE-MuDR	13242	993033	0.11
		TcMar-Fot1	15603	929716	0.11
		Maverick	44576	3625887	0.41
		Sola-1	24586	1971166	0.22
		Sola-3	14693	1636844	0.19
		TcMar	13544	1494012	0.17
		PIF-Spy	12262	1235039	0.14
		TcMar-Tigger	46735	7385345	0.84
		Other	115183	7976529	0.91
	RC		48435	4052418	0.46
		Helitron	48435	4052418	0.46
	MITE		89023	41215034	4.68
		Unknown	89023	41215034	4.68
Total TEs			2592238	386658908	43.87
Tandem Repeats			245072	12733661	1.44
	SSR		126350	1778847	0.2
	tandem_repeat		118722	10954814	1.24
Unknown			227625	26794520	3.04
Simple repeats			26220	4832199	0.55
Other			50354	5291247	0.6
Low complexity			1999	384482	0.04
Total Repeats			3143508	436695017	49.55

## Sheet: Table S8
Supplementary Table S8. Summary of the results for BUSCO analysis according to Cranoglanis bouderius gene prediction.
Type	Number	Percent (%)
Complete BUSCOs (C)	3497	96.07
Complete and single-copy BUSCOs (S)	3451	94.81
Complete and duplicated BUSCOs (D)	46	1.26
Fragmented BUSCOs (F)	21	0.58
Missing BUSCOs (M)	122	3.35
Total BUSCO groups searched	3640	100

## Sheet: Table S9
Supplementary Table S9. Summary of functional annotations for all gene models predicted for Cranoglanis bouderius genome.
Type		Number	Percent (%)
Annotation	Swissprot	20172	92.89
	KEGG	14311	65.9
	KOG	14819	68.24
	GO	15078	69.44
	NR	21008	96.74
Total	Annotated	21085	97.1
	Gene	21715	—

## Sheet: Table S10
Supplementary Table S10. Significantly expanded and contracted gene families in Cranoglanis bouderius genome.
Family ID	Expansion (+)/ Contraction (-)	Astyanax mexicanus	Electrophorus electricus	Danio rerio	Ictalurus punctatus	Tachysurus fulvidraco	Glyptosternon maculatum	Silurus meridionalis	Cranoglanis bouderius	Gasterosteus aculeatus	Ozyzias latipes	Lepisosteus oculatus	Takifugu rubripes
OG3	+	49	49	96	53	54	9	20	73	24	42	27	72
OG32	+	3	8	32	10	26	1	1	19	19	14	1	10
OG143	+	4	5	9	6	6	5	5	11	5	7	4	5
OG181	+	5	3	6	6	17	3	3	21	0	0	3	0
OG207	+	8	3	7	3	2	2	3	5	4	14	4	8
OG239	+	2	4	35	3	8	0	1	5	0	0	2	0
OG308	+	0	1	0	9	6	1	1	16	10	10	0	1
OG439	+	3	5	2	2	5	0	4	7	3	7	0	9
OG483	+	3	3	3	7	10	0	2	12	1	1	0	3
OG742	+	1	0	1	3	10	1	1	12	2	5	0	1
OG774	+	3	5	1	1	7	2	1	11	0	2	0	3
OG976	+	4	2	6	3	2	1	1	5	0	3	3	2
OG1017	+	3	7	3	1	4	0	3	6	1	1	1	1
OG1041	+	2	1	1	1	0	0	13	4	6	1	0	2
OG1116	+	0	2	1	3	6	2	3	8	0	2	2	0
OG1124	+	2	2	4	2	1	1	2	7	2	2	1	2
OG1147	+	1	3	4	1	4	0	2	7	1	3	1	1
OG1254	+	2	1	1	5	4	3	2	8	0	0	0	0
OG1317	+	6	2	0	2	2	0	0	5	1	7	0	0
OG1754	+	0	0	2	2	2	1	1	6	3	3	1	2
OG2297	+	0	0	4	1	0	0	0	12	0	3	0	0
OG2457	+	1	1	1	1	1	1	1	8	1	1	1	1
OG2573	+	1	0	12	0	0	0	1	3	0	1	0	0
OG2721	+	1	1	1	1	1	1	0	7	1	1	1	1
OG2862	+	0	0	0	0	0	3	0	11	0	0	0	2
OG2864	+	1	0	2	2	0	1	2	8	0	0	0	0
OG2865	+	1	1	2	1	2	1	1	4	0	2	1	0
OG2867	+	0	0	1	2	1	1	2	4	0	3	1	1
OG3058	+	0	0	0	4	0	0	2	9	0	0	0	0
OG3059	+	0	0	0	1	1	1	0	10	1	0	0	1
OG3326	+	3	0	1	1	0	1	1	7	0	0	0	0
OG3991	+	1	1	0	1	2	0	0	8	0	0	0	0
OG4001	+	0	0	0	2	3	1	1	6	0	0	0	0
OG4003	+	0	0	0	3	2	0	3	5	0	0	0	0
OG5546	+	0	0	0	2	1	0	0	9	0	0	0	0
OG5551	+	0	0	0	1	1	1	1	8	0	0	0	0
OG9928	+	1	2	0	0	2	0	1	4	0	1	0	0
OG12464	+	0	0	0	2	3	0	1	4	0	0	0	0
OG12467	+	0	0	0	0	0	0	1	9	0	0	0	0
OG13652	+	0	0	2	0	0	0	3	4	0	0	0	0
OG15088	+	0	0	1	0	0	0	1	5	0	0	0	0
OG15690	+	0	0	0	1	0	0	0	5	0	0	0	0
OG15694	+	0	0	0	0	0	1	1	3	1	0	0	0
OG15698	+	0	0	0	0	1	0	0	5	0	0	0	0
OG16683	+	0	0	0	1	0	0	0	3	0	0	0	0
OG11	-	24	24	31	25	14	7	13	6	22	27	18	25
OG28	-	1	0	0	4	0	0	143	0	0	0	2	0
OG30	-	13	14	12	13	13	10	8	8	15	13	7	19
OG31	-	13	13	11	19	45	3	17	3	2	7	5	6
OG40	-	18	6	45	10	11	3	8	4	0	9	4	15
OG47	-	9	11	18	9	11	7	7	5	13	7	11	13
OG49	-	20	21	19	14	20	1	6	4	2	4	8	1
OG56	-	4	8	16	14	21	8	11	7	3	8	2	12
OG60	-	26	0	52	6	8	3	2	3	1	3	3	1
OG97	-	6	15	6	5	14	1	4	2	3	1	24	4
OG361	-	4	10	8	7	10	1	3	1	2	2	1	2
OG443	-	1	2	4	5	14	3	3	1	1	7	4	2
OG476	-	1	5	7	5	6	5	3	2	2	4	3	3
OG529	-	5	5	4	5	5	2	4	2	2	5	2	3
OG531	-	6	2	8	9	9	1	2	1	1	1	2	2
OG606	-	3	3	7	3	2	3	3	1	2	4	2	8
OG618	-	3	0	18	4	3	1	7	0	3	0	0	2
OG744	-	0	2	5	5	14	3	5	3	0	0	0	0
OG808	-	7	4	3	4	9	0	3	0	0	1	3	1
OG897	-	4	0	2	7	5	0	3	1	2	8	1	1
OG910	-	2	7	0	5	12	0	6	2	0	0	0	0
OG1105	-	3	3	3	3	3	0	3	0	3	2	3	3
OG1113	-	3	1	3	3	14	0	2	0	0	0	1	2
OG1294	-	1	3	2	10	4	1	4	1	0	0	0	0
OG1564	-	2	0	5	6	9	0	0	0	1	0	1	0
OG1910	-	2	0	6	5	4	1	3	1	0	0	0	0
OG1940	-	4	5	2	5	1	1	3	1	0	0	0	0
OG2176	-	1	7	0	3	8	0	2	0	0	0	0	0
OG2333	-	3	0	3	5	3	0	2	0	3	1	0	0
OG2391	-	3	1	4	3	0	0	3	0	0	2	0	3
OG2559	-	4	5	0	4	4	1	0	0	0	0	0	0
OG2925	-	1	1	5	2	5	0	2	0	0	0	0	0
OG2963	-	1	1	2	3	3	1	2	0	0	1	1	1
OG3759	-	0	0	0	5	6	0	3	0	0	0	0	0
OG10210	-	0	0	0	6	2	1	2	0	0	0	0	0
OG12655	-	0	0	0	3	4	0	3	0	0	0	0	0
OG12658	-	0	0	0	3	2	1	4	0	0	0	0	0
OG15215	-	0	0	0	2	2	0	3	0	0	0	0	0

[truncated: 3 more sheets: Table S11, Table S12, Table S13]
